# Supplementary material for: Real‐world data on switching from intravenous to subcutaneous vedolizumab treatment in patients with inflammatory bowel disease
Source: PubMed Central journal article supplement — Aliment Pharmacol Ther. 2022 Apr 25;55(11):1389–401. doi: 10.1111/apt.16927 (PMC9322578; doi:10.1111/apt.16927), 2022-04-25
Supplement: APT-55-1389-s001.pdf [file APT-55-1389-s001.pdf]

**Supplementary Table 1. Patient satisfaction with the injector pen, overall experience, and treatment preference questionnaires**

---

|                                                                                                                                                                                                                                                                                                                                                                                                                                                                                                                                                                                                                                                              |
|--------------------------------------------------------------------------------------------------------------------------------------------------------------------------------------------------------------------------------------------------------------------------------------------------------------------------------------------------------------------------------------------------------------------------------------------------------------------------------------------------------------------------------------------------------------------------------------------------------------------------------------------------------------|
| <b>Patient satisfaction with the injector pen</b>                                                                                                                                                                                                                                                                                                                                                                                                                                                                                                                                                                                                            |
| <b>Evaluation of the injector pen questionnaire</b> (adapted from Callis Duffin <i>et al.</i> ) <sup>†</sup>                                                                                                                                                                                                                                                                                                                                                                                                                                                                                                                                                 |
| <ul style="list-style-type: none"><li>• It was easy for me to learn how to use the injector pen</li><li>• It was easy for me to remove the safety cap of the injector pen</li><li>• It was easy for me to hold the injector pen in my hand during administration</li><li>• It was easy for me to understand when the dose was complete</li><li>• It was easy for me to store the injector pen in the refrigerator</li><li>• Overall, it was easy for me to administer the injection myself</li><li>• The injector pen is firmly rested against the skin during the injection</li><li>• I feel confident that I am using the injector pen correctly</li></ul> |
| <b>Response options:</b> <i>strongly agree; agree; slightly agree; neither agree nor disagree; slightly disagree; disagree; strongly disagree</i>                                                                                                                                                                                                                                                                                                                                                                                                                                                                                                            |
| <b>Overall injection experience</b> (adapted from Tischer <i>et al.</i> ) <sup>‡</sup>                                                                                                                                                                                                                                                                                                                                                                                                                                                                                                                                                                       |
| <ul style="list-style-type: none"><li>• Altogether, how satisfied are you with the overall injection experience?</li></ul>                                                                                                                                                                                                                                                                                                                                                                                                                                                                                                                                   |
| <b>Response options:</b> <i>very satisfied; satisfied; neither satisfied nor dissatisfied; dissatisfied; very dissatisfied</i>                                                                                                                                                                                                                                                                                                                                                                                                                                                                                                                               |
| <b>Intravenous versus subcutaneous administration</b>                                                                                                                                                                                                                                                                                                                                                                                                                                                                                                                                                                                                        |
| <ul style="list-style-type: none"><li>• Which mode of administration do you feel has the best therapeutic effect?</li><li>• Which mode of administration is more convenient for you as a patient?</li><li>• Which mode of administration makes you feel more safe as a patient?</li><li>• Do you prefer IV or SC administration of vedolizumab?</li></ul>                                                                                                                                                                                                                                                                                                    |
| <b>Response options:</b> <i>prefer SC injections; slightly prefer SC injections; no preference; slightly prefer IV infusions; prefer IV infusions</i>                                                                                                                                                                                                                                                                                                                                                                                                                                                                                                        |

---

Abbreviations: IV, intravenous; SC, subcutaneous.

<sup>†</sup> Callis Duffin K, Bukhalo M, Bobonich MA, et al. Usability of a novel disposable autoinjector device for ixekizumab: results from a qualitative study and an open-label clinical trial, including patient-reported experience. *Med Devices (Auckl)*. 2016;9:361-369.

<sup>‡</sup> Tischer B, Mehl A. Patients' and nurses' preferences for autoinjectors for rheumatoid arthritis: results of a European survey. *Patient Preference Adherence*. 2018;12:1413-1424.
