# Supplementary material for: Real‐world data on switching from intravenous to subcutaneous vedolizumab treatment in patients with inflammatory bowel disease
Source: PubMed Central journal article supplement — Aliment Pharmacol Ther. 2022 Apr 25;55(11):1389–401. doi: 10.1111/apt.16927 (PMC9322578; doi:10.1111/apt.16927), 2022-04-25
Supplement: APT-55-1389-s002.pdf [file APT-55-1389-s002.pdf]

**Supplementary Figure 1.**

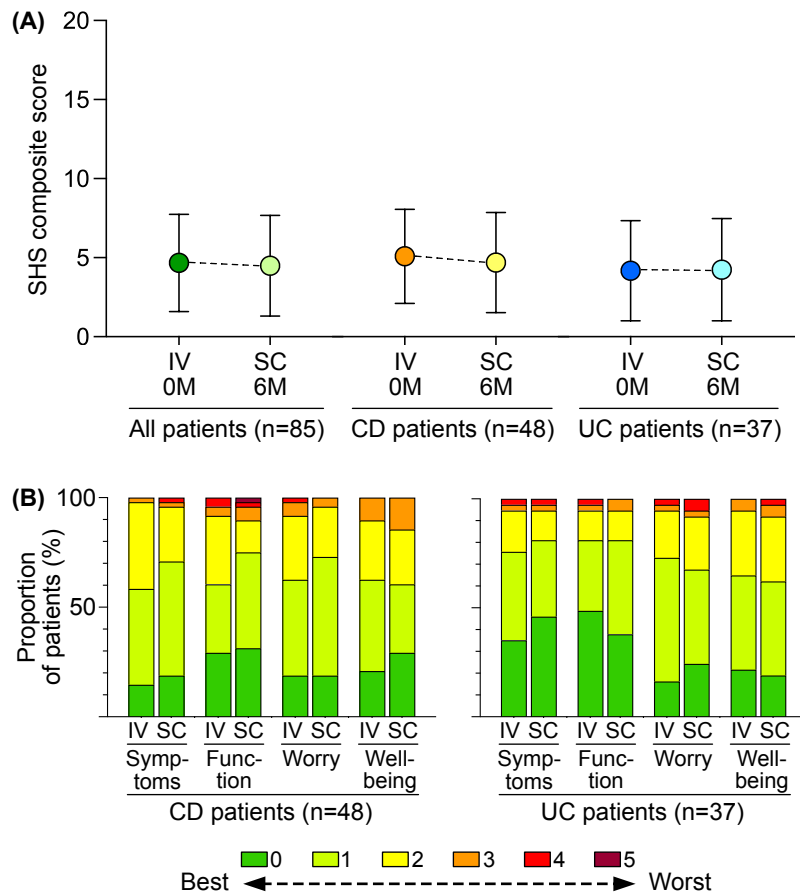

**Supplementary Figure 1.** Comparisons of health-related quality-of-life measures based on the Short Health Scale (SHS) at baseline and 6 months after switch from IV to SC vedolizumab treatment. A) SHS composite scores (range 0-20; high values signify low quality-of-life) presented as mean values with SD. B) Individual SHS items (range 0-5; high values signify low quality-of-life) including symptom burden, social function, disease-related worry, and general well-being. Data are presented as proportions of patients (percentages) who reported a specific response option (0-5) at baseline (IV) and follow-up (SC), respectively. Abbreviations: CD, Crohn's disease; IV, intravenous; M, months; SC, subcutaneous; SD, standard deviation; SHS, Short Health Scale; UC, ulcerative colitis.
