# Supplementary material for: Real‐world data on switching from intravenous to subcutaneous vedolizumab treatment in patients with inflammatory bowel disease
Source: PubMed Central journal article supplement — Aliment Pharmacol Ther. 2022 Apr 25;55(11):1389–401. doi: 10.1111/apt.16927 (PMC9322578; doi:10.1111/apt.16927), 2022-04-25
Supplement: APT-55-1389-s003.pdf [file APT-55-1389-s003.pdf]

**Supplementary Table 2. IBD treatment prior to baseline and treatment changes during primary study period (6 months follow-up)**

| <b>IBD treatment prior to baseline</b>                           | <b>All patients (IBD)</b> | <b>Crohn's disease</b> | <b>Ulcerative colitis</b> |
|------------------------------------------------------------------|---------------------------|------------------------|---------------------------|
| <b>Conventional oral treatment, n (%)</b>                        |                           |                        |                           |
| 5-aminosalicylic acid                                            | 61 (68.5)                 | 24 (50)                | 37 (90.2)                 |
| Azathioprine                                                     | 76 (85.4)                 | 42 (87.5)              | 34 (82.9)                 |
| 6-mercaptopurine                                                 | 14 (15.7)                 | 8 (16.7)               | 6 (14.6)                  |
| Methotrexate                                                     | 24 (27.0)                 | 18 (37.5)              | 6 (14.6)                  |
| Systemic corticosteroids <sup>a</sup>                            | 70 (78.7)                 | 34 (70.8)              | 36 (87.8)                 |
| Budesonide                                                       | 39 (43.8)                 | 27 (56.3)              | 12 (29.3)                 |
| <b>Topical treatment, n (%)</b>                                  |                           |                        |                           |
| 5-aminosalicylic acid                                            | 36 (40.4)                 | 6 (12.5)               | 30 (73.2)                 |
| Corticosteroids <sup>b</sup>                                     | 30 (33.7)                 | 9 (18.8)               | 21 (51.2)                 |
| <b>Prior biologic or Janus Kinase inhibitor treatment, n (%)</b> |                           |                        |                           |
| Vedolizumab (IV)                                                 | 89 (100)                  | 48 (100)               | 41 (100)                  |
| Infliximab                                                       | 70 (78.7)                 | 38 (79.2)              | 32 (78)                   |
| Adalimumab                                                       | 47 (52.8)                 | 34 (70.8)              | 13 (31.7)                 |
| Ustekinumab                                                      | 2 (2.2)                   | 2 (4.2)                | 0 (0.0)                   |
| Golimumab                                                        | 1 (1.1)                   | 1 (2.1)                | 0 (0.0)                   |
| Certolizumab                                                     | 1 (1.1)                   | 1 (2.1)                | 0 (0.0)                   |
| Natalizumab                                                      | 1 (1.1)                   | 1 (2.1)                | 0 (0.0)                   |
| Tofacitinib                                                      | 3 (3.4)                   | 0 (0.0)                | 3 (7.3)                   |
| <b>Changes in treatment during primary study period, n (%)</b>   |                           |                        |                           |
| Vedolizumab dose optimized (to 108 mg once weekly)               | 9 (10.1)                  | 6 (12.5)               | 3 (7.3)                   |
| Vedolizumab discontinued                                         | 4 (4.5)                   | 0 (0.0)                | 4 (9.8)                   |
| <b>Added</b>                                                     |                           |                        |                           |
| None                                                             | 83 (93.3)                 | 44 (91.7)              | 39 (95.1)                 |
| Systemic corticosteroids <sup>a</sup>                            | 3 (3.4)                   | 2 (4.2)                | 1 (2.4)                   |
| Oral budesonide                                                  | 1 (1.1)                   | 1 (2.1)                | 0 (0.0)                   |
| Topical corticosteroids <sup>b</sup>                             | 3 (3.4)                   | 2 (4.2)                | 1 (2.4)                   |
| Antibiotics                                                      | 1 (1.1)                   | 1 (2.1)                | 0 (0.0)                   |
| <b>Discontinued</b>                                              |                           |                        |                           |
| None                                                             | 84 (94.4)                 | 47 (97.9)              | 37 (41)                   |
| Oral 5-aminosalicylic acid                                       | 3 (3.4)                   | 1 (2.1)                | 2 (4.9)                   |
| Azathioprine                                                     | 1 (1.1)                   | 0 (0.0)                | 1 (2.4)                   |
| Oral prednisolone                                                | 1 (1.1)                   | 0 (0.0)                | 1 (2.4)                   |
| <b>Dose increased</b>                                            |                           |                        |                           |
| Oral 5-aminosalicylic acid                                       | 1 (1.1)                   | 0 (0.0)                | 1 (2.4)                   |

<sup>a</sup>Prednisolone or betamethasone (oral or iv), <sup>b</sup>prednisolone or budesonide.

Abbreviations: IBD, inflammatory bowel disease; IV, intravenous; n, number of patients.
